# Supplementary material
Source: PubMed Central journal article supplement (PMC9529245)
Supplement: NIHMS1837917-supplement-1.pdf [file NIHMS1837917-supplement-1.pdf]

# Supplementary Figure 1

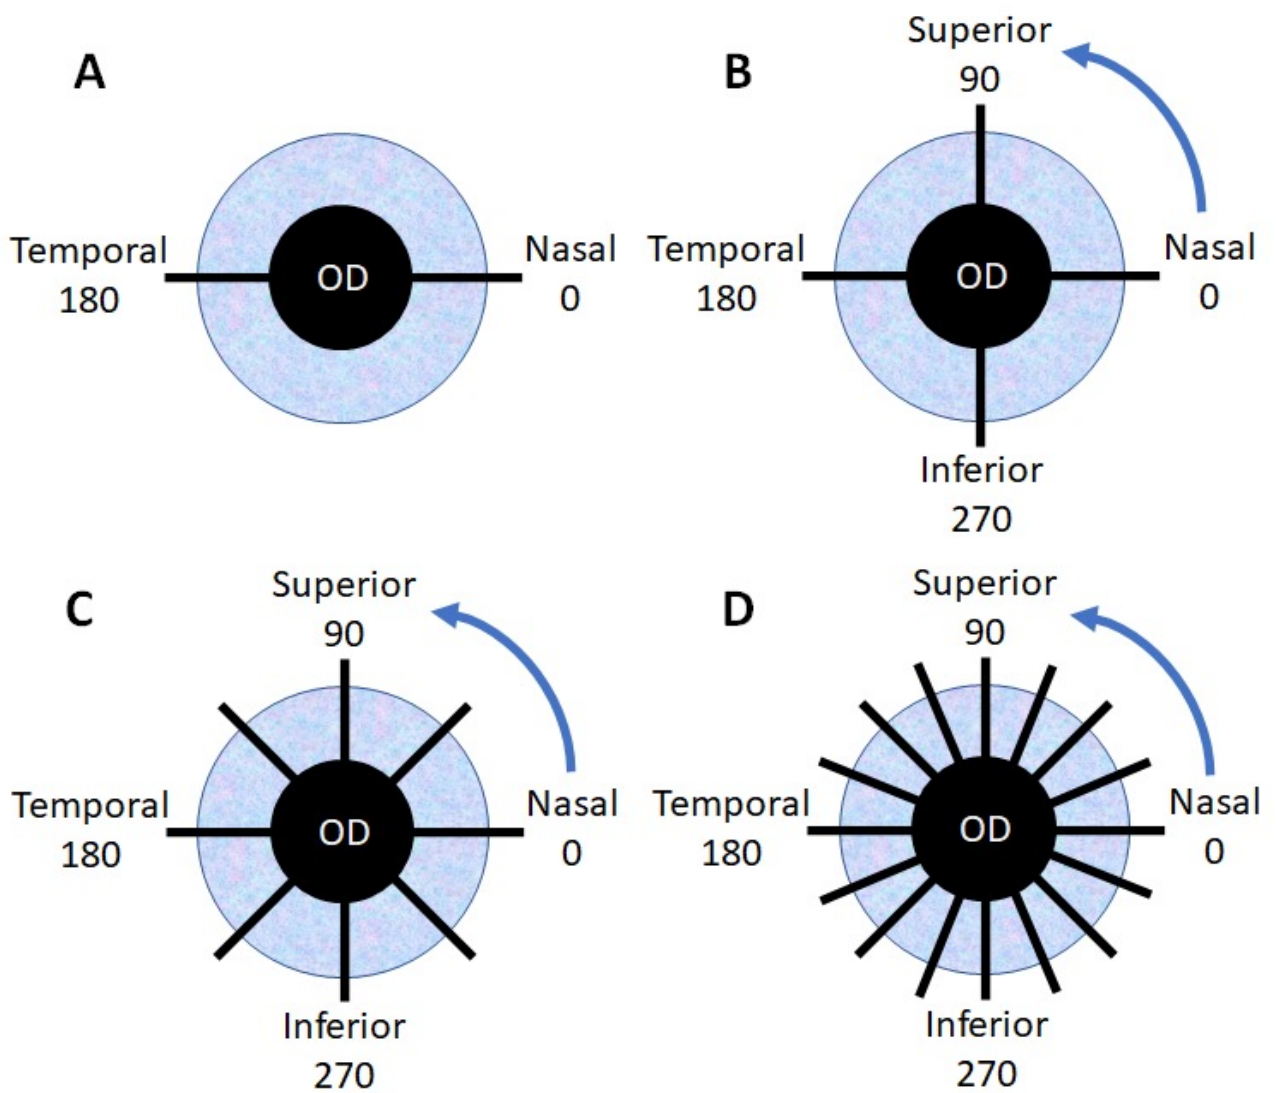

## Supplementary Table 1: Mean measurements of AS-OCT parameters by quartile and overall.

|                       | <b>AOD500</b> | <b>TISA500</b> | <b>IA</b> | <b>ACD</b> | <b>ACW</b> | <b>AOD750</b> | <b>TISA750</b> | <b>IC</b> | <b>LV</b> | <b>ACA</b> |
|-----------------------|---------------|----------------|-----------|------------|------------|---------------|----------------|-----------|-----------|------------|
| <b>Q1</b>             | 0.08          | 0.03           | 1.48      | 2.06       | 11.45      | 0.11          | 0.05           | 0.27      | 0.87      | 14.10      |
| <b>Q2</b>             | 0.09          | 0.04           | 1.62      | 2.14       | 11.41      | 0.14          | 0.07           | 0.28      | 0.80      | 14.29      |
| <b>Q3</b>             | 0.13          | 0.06           | 1.56      | 2.20       | 11.38      | 0.18          | 0.10           | 0.29      | 0.78      | 14.85      |
| <b>Q4</b>             | 0.18          | 0.09           | 1.59      | 2.20       | 11.47      | 0.21          | 0.14           | 0.32      | 0.85      | 15.11      |
| <b>Total (N = 40)</b> | 0.12          | 0.06           | 1.56      | 2.15       | 11.43      | 0.16          | 0.09           | 0.29      | 0.82      | 14.59      |
